# Supplementary material for: Differential neural encoding of sensorimotor and visual body representations
Source: PubMed Central journal article supplement (PMC5121642; doi:10.1038/srep37259), 2016-11-24
Supplement: srep37259-s1.pdf [file srep37259-s1.pdf]

# SUPPLEMENTARY MATERIAL

for

## DIFFERENTIAL NEURAL ENCODING OF SENSORIMOTOR AND VISUAL BODY REPRESENTATIONS

David Perruchoud<sup>1#</sup>, Lars Michels<sup>2#</sup>, Marco Piccirelli<sup>2</sup>, Roger Gassert<sup>3</sup>, Silvio Ionta<sup>1,3,\*</sup>

1. The Laboratory for Investigative Neurophysiology (The LINE), Department of Radiology and Department of Clinical Neurosciences, University Hospital Center (CHUV) and University of Lausanne (UNIL), Lausanne, Switzerland

2. Institute of Neuroradiology, University Hospital Zurich, Zurich, Switzerland

3. Rehabilitation Engineering Laboratory, Department of Health Sciences and Technology, ETH Zürich, Zurich, Switzerland

\* Corresponding Author

# contributed equally

All correspondence should be addressed to:

Silvio Ionta

CHUV, Avenue Pierre Decker 5, 1011 Lausanne, Switzerland

voice: +41213148085

email: [ionta.silvio@gmail.com](mailto:ionta.silvio@gmail.com)

### Methods

*Behavioral data* - Post-hoc comparisons were carried out using the Bonferroni correction ( $p < 0.05$ ). Following earlier analysis pipelines<sup>1</sup>, trials whose RTs were shorter than 500ms or longer than 2800ms were excluded from the analysis, with a total of loss of 3.5% of the responses.

*fMRI data* were corrected for head motion and slice-timing, coregistered with the corresponding anatomical scan, normalized to the MNI template, and smoothed using a 6mm FWHM spatial filter to augment the signal-to-noise ratio<sup>2</sup>.

### Results

*Behavior* - The significant 3-way interaction between stimulus, side, and orientation [ $F(3,45) = 6.24$ ;  $p < 0.05$ ], indicated that the typical mental rotation function was preserved for both right- and left-lateralized hands, as well as for left-lateralized full-bodies. However, despite the typical progressive increase in RTs for right-lateralized full-bodies at 0°, 90°, and 180° (all  $p < 0.05$ ), the RTs for images at 270° were not statistically different with respect to 180° ( $p > 0.1$ ).

44 The significant 2-way interaction between stimulus and side ( $F(1,15)=5.62$ ;  $p<0.05$ ) indicated  
45 that, with each category (hands, full-bodies), the speed to mentally rotate left- and right-  
46 lateralized images was equivalent (all  $p>0.1$ ). Other effects generally confirmed previous  
47 findings on the increase of RTs as a function of stimulus orientation <sup>3</sup>.

48  
49  
50  
51

**Figure S1**

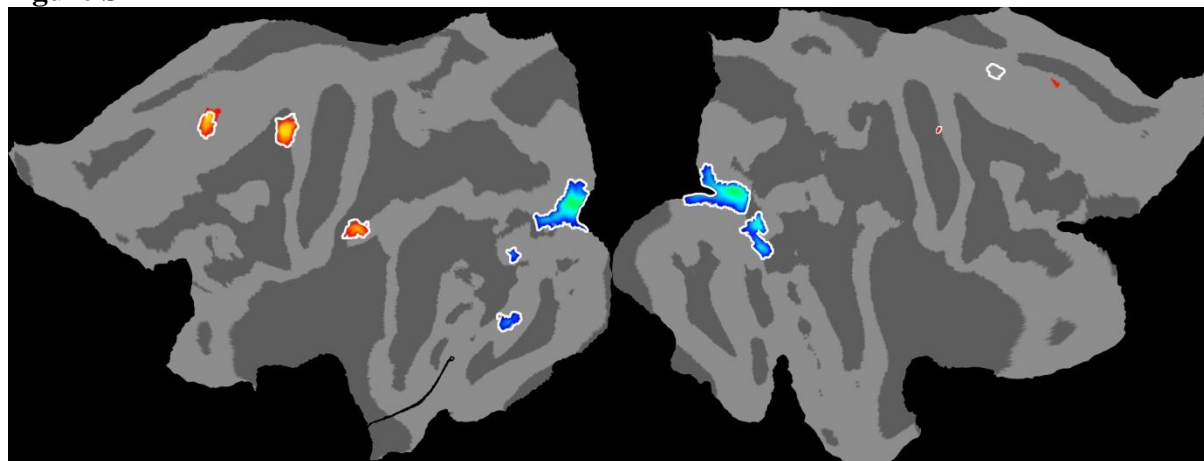

52  
53

54 **Figure S1. Stability Check.** The activation clusters resulting from the stability check analysis  
55 performed with RTs as covariate reasonably overlapped (white outline) with the ones resulting  
56 from the first second-level analysis (red-to-yellow and blue-to-green).

57  
58  
59

#### References

- 60  
61 1 Kosslyn, S. M., DiGirolamo, G. J., Thompson, W. L. & Alpert, N. M. Mental rotation of objects versus  
62 hands: neural mechanisms revealed by positron emission tomography. *Psychophysiology* **35**, 151-161  
63 (1998).  
64  
65 2 Friston, K. J., Worsley, K. J., Frackowiak, R. S., Mazziotta, J. C. & Evans, A. C. Assessing the significance  
66 of focal activations using their spatial extent. *Hum Brain Mapp* **1**, 210-220, (1994).  
67  
68 3 Ionta, S., Fourkas, A. D., Fiorio, M. & Aglioti, S. M. The influence of hands posture on mental rotation of  
69 hands and feet. *Exp Brain Res* **183**, 1-7, (2007).  
70

|                          |                     | LH                  |                     |                   | RH                 |                     |                   |
|--------------------------|---------------------|---------------------|---------------------|-------------------|--------------------|---------------------|-------------------|
|                          |                     | <i>x</i>            | <i>y</i>            | <i>z</i>          | <i>x</i>           | <i>y</i>            | <i>z</i>          |
| 2001                     | Downing et al.      | -51                 | -72                 | 8                 | 51                 | -71                 | 1                 |
| 2002                     | Grossman & Blake    | -39                 | -73                 | 11                | 41                 | -68                 | 8                 |
| 2004                     | Astafiev et al.     | -52                 | -74                 | 5                 | -                  | -                   | -                 |
|                          | Chan et al.         | -46                 | -75                 | 0                 | 46                 | -71                 | -3                |
| 2005                     | Peelen & Downing, c | -43                 | -74                 | -7                | 46                 | -72                 | -5                |
|                          | Urgesi et al.       | -                   | -                   | -                 | 55                 | -75                 | -1                |
|                          | Peelen & Downing, b | -46                 | -76                 | -8                | 43                 | -70                 | -4                |
|                          | Sakreida et al.     | -37                 | -76                 | 11                | 41                 | -73                 | 6                 |
| 2006                     | Arzy et al.         | -44                 | -71                 | -1                | -                  | -                   | -                 |
|                          | Downing et al., b   | -                   | -                   | -                 | 43                 | -72                 | -4                |
|                          | Spiridon et al.     | -64                 | -83                 | 21                | 33                 | -77                 | 2                 |
|                          | Downing et al., a   | -46                 | -71                 | 1                 | 46                 | -69                 | 2                 |
|                          | Morris et el.       | -42                 | -83                 | 9                 | 56                 | -82                 | 9                 |
| 2007                     | David et al.        | -50                 | -76                 | 10                | 52                 | -70                 | 5                 |
|                          | Downing et al.      | -48                 | -69                 | 3                 | 48                 | -72                 | -1                |
|                          | Taylor et al.       | -48                 | -73                 | -4                | 50                 | -67                 | 1                 |
|                          | Grezes et al.       | -44                 | -82                 | 4                 | 54                 | -72                 | 6                 |
|                          | Urgesi et al.       | -53                 | -71                 | 4                 | 52                 | -73                 | 4                 |
| 2008                     | Hodzic et al.       | -46                 | -70                 | 0                 | 48                 | -64                 | 0                 |
|                          | Lamm & Decety       | -54                 | -69                 | 9                 | 54                 | -67                 | 8                 |
|                          | Pichon et al.       | -44                 | -86                 | 0                 | 53                 | -76                 | 0                 |
| 2010                     | Blanke et al.       | -45                 | -83                 | -4                | -                  | -                   | -                 |
|                          | Calvo-Merino et al. | -55                 | -74                 | 0                 | 55                 | -74                 | 0                 |
| 2011                     | Ionta et al.        | -46                 | -74                 | 2                 | 50                 | -70                 | 0                 |
| 2012                     | Sinke et al.        | -42                 | -76                 | 5                 | -                  | -                   | -                 |
|                          | Tomasino et al.     | -42                 | -76                 | 4                 | 46                 | -76                 | -4                |
| 2015                     | Beck et al.         | -47                 | -72                 | 7                 | -                  | -                   | -                 |
|                          | Engelen et al.      | -                   | -                   | -                 | 47                 | -74                 | -3                |
| 2016                     | Cazzato et al.      | -53                 | -74                 | 0                 | 52                 | -74                 | 0                 |
| Limanowski & Blankenburg |                     | -46                 | -82                 | -2                | 46                 | -78                 | 0                 |
| <b>Mean (±StDev)</b>     |                     | <b>-47.1 (±5.6)</b> | <b>-75.4 (±4.8)</b> | <b>3.3 (±6.3)</b> | <b>48.3 (±5.5)</b> | <b>-72.3 (±3.9)</b> | <b>1.1 (±4.1)</b> |

71

72 **Table S1. EBA location.** Mean and standard deviation of the EBA coordinates over 30 studies.

73 The centroids of the EBA clusters found in the present study (-43, -83, -6 and 41, -81, -1) were

74 within the range of coordinates reported in previous studies.
